# Supplementary material for: General and Abdominal Adiposity and Risk of Death in Europe
Source: Atypon-hosted journal article supplement (doi:10.1056/nejmoa0801891), 2008-11-12

## Supplementary Appendix

This appendix has been provided by the authors to give readers additional information about their work.

Supplement to: Pischon T, Boeing H, Hoffmann K, et al. General and abdominal adiposity and risk of death in Europe. *N Engl J Med* 2008;359:2105-20.

## **Online supplement**

Pischon et al.: General and Abdominal Adiposity and Risk of Death in Europe

### **Appendix 1: Correction of Participants' Body Weight and Waist and Hip circumference**

Each participant's body weight and waist and hip circumference was corrected to reduce heterogeneity due to protocol differences in clothing worn during measurement. For subjects who were normally dressed and without shoes, 1.5 kg for weight and 2.0 cm for circumferences were subtracted from the original measurement, while for subjects in light clothing without shoes 1 kg was subtracted from weight. For part of the Oxford (UK) cohort, linear regression models were used to predict sex- and age-specific values from subjects with both measured and self-reported body measures (1-3).

#### **References**

1. Haftenberger M, Lahmann PH, Panico S, et al. Overweight, obesity and fat distribution in 50- to 64-year-old participants in the European Prospective Investigation into Cancer and Nutrition (EPIC). *Public Health Nutr* 2002;5(6B):1147-62.
2. Spencer EA, Appleby PN, Davey GK, Key TJ. Validity of self-reported height and weight in 4808 EPIC-Oxford participants. *Public Health Nutr* 2002;5(4):561-5.
3. Spencer EA, Roddam AW, Key TJ. Accuracy of self-reported waist and hip measurements in 4492 EPIC-Oxford participants. *Public Health Nutr* 2004;7(6):723-7.

**Supplementary Table 1: Cohort characteristics and number of deaths in men and women by country in EPIC**

| Country         | Cohort Size, n |         | Mean age, y |       | Mean follow-up, y |       | Person-years |           | Deaths, n |       |
|-----------------|----------------|---------|-------------|-------|-------------------|-------|--------------|-----------|-----------|-------|
|                 | Men            | Women   | Men         | Women | Men               | Women | Men          | Women     | Men       | Women |
| France          | 0              | 19,589  | -           | 52.8  | -                 | 12.9  | 0            | 252,059   | 0         | 348   |
| Italy           | 13,648         | 30,150  | 50.1        | 50.6  | 9.1               | 9.2   | 123,870      | 278,191   | 370       | 516   |
| Spain           | 14,787         | 24,455  | 50.7        | 48.3  | 10.9              | 10.8  | 160,440      | 263,902   | 675       | 430   |
| UK              | 21,365         | 50,828  | 52.4        | 47.5  | 9.2               | 9.4   | 196,404      | 476,282   | 1543      | 1673  |
| The Netherlands | 9511           | 25,919  | 42.9        | 50.7  | 10.6              | 9.8   | 100,401      | 254,314   | 326       | 820   |
| Greece          | 10,025         | 14,722  | 52.3        | 53.1  | 7.0               | 7.3   | 70,262       | 107,340   | 686       | 426   |
| Germany         | 20,453         | 27,366  | 52.2        | 49.0  | 8.3               | 8.3   | 169,798      | 227,811   | 868       | 425   |
| Sweden          | 9521           | 13,798  | 58.7        | 57.2  | 11.4              | 11.4  | 108,515      | 157,289   | 1196      | 845   |
| Denmark         | 25,042         | 28,208  | 56.5        | 56.7  | 9.9               | 10.1  | 248,112      | 285,181   | 2141      | 1435  |
| Total           | 124,352        | 235,035 | 52.5        | 51.0  | 9.5               | 9.8   | 1,177,801    | 2,302,430 | 7805      | 6918  |

**Supplementary Table 2:** Characteristics of study participants by BMI\*

|                                       | BMI        |             |               |               |               |               |               |               |             |
|---------------------------------------|------------|-------------|---------------|---------------|---------------|---------------|---------------|---------------|-------------|
|                                       | <18.5      | 18.5-<21.0  | 21.0-<23.5    | 23.5-<25.0    | 25.0-<26.5    | 26.5-<28.0    | 28.0-<30.0    | 30.0-<35.0    | ≥35.0       |
| <b>Men</b>                            | <b>496</b> | <b>4783</b> | <b>18,495</b> | <b>19,819</b> | <b>22,608</b> | <b>19,734</b> | <b>18,799</b> | <b>16,899</b> | <b>2719</b> |
| Age, years, mean                      | 49.9       | 48.1        | 50.4          | 52.1          | 52.8          | 53.3          | 53.5          | 53.7          | 53.6        |
| Alcohol consumption, g/d, mean        | 21.9       | 19.8        | 21.1          | 21.6          | 22.6          | 23.7          | 24.1          | 25.8          | 27.1        |
| Smoking status†, %                    |            |             |               |               |               |               |               |               |             |
| Never smoker                          | 25.1       | 34.3        | 34.9          | 33.2          | 32.1          | 29.2          | 28.6          | 27.2          | 26.7        |
| Past smoker                           | 20.6       | 23.0        | 30.3          | 34.7          | 36.8          | 39.5          | 40.2          | 41.0          | 40.4        |
| Current smoker                        | 53.8       | 41.7        | 33.5          | 30.7          | 29.5          | 29.8          | 29.9          | 30.4          | 31.6        |
| Weight, kg, mean                      | 54.6       | 62.7        | 69.7          | 74.8          | 78.8          | 82.8          | 87.2          | 94.9          | 112.4       |
| Height, cm, mean                      | 175.7      | 176.2       | 175.9         | 175.4         | 174.8         | 174.2         | 173.5         | 172.7         | 172.5       |
| Waist circumference, cm, mean         | 74.2       | 79.2        | 84.7          | 89.0          | 92.5          | 96.1          | 100.2         | 106.9         | 120.0       |
| Hip circumference, cm, mean           | 87.6       | 91.4        | 94.8          | 97.5          | 99.6          | 101.6         | 104.1         | 108.4         | 117.9       |
| Waist-hip-ratio, mean                 | 0.85       | 0.87        | 0.89          | 0.91          | 0.93          | 0.95          | 0.96          | 0.99          | 1.02        |
| Education†, %                         |            |             |               |               |               |               |               |               |             |
| No school degree or primary school    | 23.1       | 21.9        | 20.8          | 23.9          | 26.7          | 31.5          | 36.8          | 42.8          | 46.2        |
| Technical/professional school         | 24.4       | 24.8        | 24.4          | 24.9          | 25.8          | 25.6          | 25.2          | 23.4          | 23.0        |
| Secondary school or university degree | 48.7       | 49.4        | 51.3          | 48.2          | 44.4          | 40.1          | 35.2          | 30.9          | 27.4        |
| Physical activity†, %                 |            |             |               |               |               |               |               |               |             |
| Inactive                              | 14.9       | 19.5        | 20.5          | 20.6          | 20.9          | 20.6          | 20.4          | 20.3          | 21.1        |
| Moderately inactive                   | 31.9       | 29.7        | 28.4          | 28.0          | 28.1          | 28.2          | 28.4          | 28.5          | 30.9        |
| Moderately active                     | 40.2       | 35.8        | 35.0          | 34.8          | 35.0          | 35.1          | 35.2          | 36.0          | 35.2        |
| Active                                | 10.0       | 12.3        | 13.5          | 13.9          | 13.5          | 13.7          | 13.7          | 13.5          | 11.7        |

*(Table continued on next page)*

(Table continued from previous page)

|                                       | BMI         |               |               |               |               |               |               |               |             |
|---------------------------------------|-------------|---------------|---------------|---------------|---------------|---------------|---------------|---------------|-------------|
|                                       | <18.5       | 18.5-<21.0    | 21.0-<23.5    | 23.5-<25.0    | 25.0-<26.5    | 26.5-<28.0    | 28.0-<30.0    | 30.0-<35.0    | ≥35.0       |
| <b>Women</b>                          | <b>4108</b> | <b>28,614</b> | <b>57,938</b> | <b>34,925</b> | <b>29,333</b> | <b>22,876</b> | <b>21,764</b> | <b>26,290</b> | <b>9187</b> |
| Age, years, mean                      | 45.5        | 46.1          | 49.0          | 51.3          | 52.3          | 53.2          | 53.9          | 54.1          | 53.6        |
| Alcohol consumption, g/d, mean        | 8.6         | 10.0          | 9.9           | 9.3           | 8.7           | 8.0           | 7.2           | 6.2           | 4.6         |
| Smoking status†, %                    |             |               |               |               |               |               |               |               |             |
| Never smoker                          | 51.3        | 52.9          | 53.2          | 53.4          | 54.6          | 57.1          | 59.8          | 63.0          | 65.0        |
| Past smoker                           | 19.4        | 22.6          | 24.2          | 24.4          | 23.6          | 21.9          | 20.6          | 18.9          | 19.5        |
| Current smoker                        | 28.1        | 22.9          | 21.3          | 21.0          | 20.6          | 19.8          | 18.5          | 16.9          | 14.5        |
| Weight, kg, mean                      | 47.2        | 53.6          | 59.3          | 63.8          | 67.2          | 70.7          | 74.4          | 81.4          | 97.0        |
| Height, cm, mean                      | 163.2       | 163.4         | 162.9         | 162.2         | 161.5         | 161.0         | 160.2         | 159.4         | 158.6       |
| Waist circumference, cm, mean         | 64.8        | 68.7          | 73.2          | 77.3          | 80.6          | 84.0          | 87.7          | 94.1          | 105.7       |
| Hip circumference, cm, mean           | 87.0        | 91.4          | 95.6          | 98.9          | 101.5         | 104.1         | 106.9         | 112.2         | 124.0       |
| Waist-hip-ratio, mean                 | 0.75        | 0.75          | 0.77          | 0.78          | 0.80          | 0.81          | 0.82          | 0.84          | 0.85        |
| Education†, %                         |             |               |               |               |               |               |               |               |             |
| No school degree or primary school    | 13.6        | 14.0          | 18.2          | 24.5          | 30.5          | 35.4          | 41.3          | 47.7          | 51.2        |
| Technical/professional school         | 21.5        | 23.7          | 25.9          | 26.1          | 25.5          | 24.8          | 22.6          | 21.1          | 20.3        |
| Secondary school or university degree | 60.0        | 57.2          | 50.7          | 44.5          | 39.2          | 35.1          | 31.4          | 26.1          | 22.4        |
| Physical activity†, %                 |             |               |               |               |               |               |               |               |             |
| Inactive                              | 18.5        | 19.2          | 18.1          | 16.6          | 15.2          | 13.9          | 12.4          | 11.3          | 11.1        |
| Moderately inactive                   | 41.9        | 37.1          | 33.9          | 31.5          | 29.3          | 28.5          | 27.1          | 26.1          | 25.8        |
| Moderately active                     | 31.9        | 34.7          | 37.7          | 41.1          | 44.2          | 47.0          | 49.5          | 51.7          | 53.1        |
| Active                                | 6.6         | 7.7           | 8.7           | 9.0           | 9.5           | 8.7           | 9.3           | 9.4           | 8.5         |

\*All values except age and number of subjects are standardized to the sex-specific age distribution of the study population using 5-year categories

†Numbers do not sum up to 100% due to missing values

**Supplementary Table 3:** Relative risk of death according to quintiles of waist-hip-ratio in men and women in the European Prospective Investigation into Cancer and Nutrition (EPIC)

|                            | Waist-hip-ratio quintile                                   |                      |                      |                      |                  | P <sub>trend</sub> * | P <sub>interaction</sub> † |
|----------------------------|------------------------------------------------------------|----------------------|----------------------|----------------------|------------------|----------------------|----------------------------|
|                            | 1                                                          | 2                    | 3                    | 4                    | 5                |                      |                            |
|                            | <b>Men</b>                                                 |                      |                      |                      |                  |                      |                            |
| <b>Waist-hip-ratio</b>     | <b>&lt;0.89</b>                                            | <b>0.89-&lt;0.92</b> | <b>0.92-&lt;0.95</b> | <b>0.95-&lt;0.99</b> | <b>≥0.99</b>     |                      |                            |
| Number of deaths           | 969                                                        | 1202                 | 1445                 | 1702                 | 2394             |                      |                            |
| Crude relative risk‡       | 1                                                          | 0.99 (0.91-1.08)     | 1.11 (1.03-1.21)     | 1.23 (1.13-1.33)     | 1.66 (1.53-1.79) | <0.0001              |                            |
| Multivariable adjusted RR§ |                                                            |                      |                      |                      |                  |                      |                            |
| without BMI                | 1                                                          | 1.01 (0.92-1.10)     | 1.07 (0.98-1.16)     | 1.15 (1.06-1.24)     | 1.44 (1.33-1.56) | <0.0001              |                            |
| with BMI                   | 1                                                          | 1.15 (1.05-1.26)     | 1.26 (1.16-1.38)     | 1.36 (1.24-1.49)     | 1.68 (1.53-1.84) | <0.0001              |                            |
|                            | <b>Multivariable adjusted relative risks in subgroups§</b> |                      |                      |                      |                  |                      |                            |
| <b>BMI tertiles</b>        |                                                            |                      |                      |                      |                  |                      | <b>0.01</b>                |
| <24.9                      | 1                                                          | 1.12 (1.00-1.26)     | 1.21 (1.07-1.37)     | 1.32 (1.16-1.51)     | 1.86 (1.58-2.19) | <0.0001              |                            |
| 24.9-<27.7                 | 1                                                          | 1.25 (1.03-1.51)     | 1.44 (1.19-1.73)     | 1.55 (1.29-1.87)     | 1.80 (1.48-2.17) | <0.0001              |                            |
| ≥27.7                      | 1                                                          | 1.00 (0.74-1.35)     | 0.94 (0.71-1.26)     | 1.00 (0.76-1.33)     | 1.28 (0.97-1.69) | <0.0001              |                            |
| <b>Smoking status¶</b>     |                                                            |                      |                      |                      |                  |                      | <b>0.79</b>                |
| Never smoker               | 1                                                          | 1.05 (0.87-1.28)     | 1.20 (0.98-1.46)     | 1.30 (1.06-1.59)     | 1.68 (1.36-2.07) | <0.0001              |                            |
| Former smoker              | 1                                                          | 1.13 (0.96-1.31)     | 1.25 (1.07-1.46)     | 1.36 (1.17-1.59)     | 1.77 (1.51-2.07) | <0.0001              |                            |
| Current smoker             | 1                                                          | 1.19 (1.04-1.37)     | 1.36 (1.19-1.57)     | 1.48 (1.28-1.70)     | 1.85 (1.60-2.15) | <0.0001              |                            |
| <b>Age category</b>        |                                                            |                      |                      |                      |                  |                      | <b>0.66</b>                |
| <55 years                  | 1                                                          | 1.17 (0.99-1.38)     | 1.31 (1.10-1.55)     | 1.45 (1.22-1.72)     | 1.93 (1.61-2.32) | <0.0001              |                            |
| 55-65 years                | 1                                                          | 1.12 (0.98-1.29)     | 1.27 (1.11-1.45)     | 1.34 (1.17-1.53)     | 1.56 (1.35-1.79) | <0.0001              |                            |
| ≥65 years                  | 1                                                          | 1.16 (0.98-1.38)     | 1.19 (1.00-1.41)     | 1.29 (1.08-1.53)     | 1.60 (1.34-1.91) | <0.0001              |                            |
| <b>Follow-up   </b>        |                                                            |                      |                      |                      |                  |                      | <b>0.68</b>                |
| ≤5 years                   | 1                                                          | 1.12 (0.97-1.30)     | 1.22 (1.06-1.42)     | 1.33 (1.15-1.55)     | 1.55 (1.33-1.81) | <0.0001              |                            |
| >5 years                   | 1                                                          | 1.17 (1.05-1.31)     | 1.29 (1.15-1.44)     | 1.37 (1.23-1.54)     | 1.75 (1.55-1.97) | <0.0001              |                            |

(Table continued on next page)

(Table continued from previous page)

|                            | Waist-hip-ratio quintile |                                                            |                      |                      |                  | P <sub>trend</sub> * | P <sub>interaction</sub> † |  |
|----------------------------|--------------------------|------------------------------------------------------------|----------------------|----------------------|------------------|----------------------|----------------------------|--|
|                            | 1                        | 2                                                          | 3                    | 4                    | 5                |                      |                            |  |
| <b>Cause of death</b>      |                          |                                                            |                      |                      |                  |                      | <b>0.002</b>               |  |
| Cancer                     | 1                        | 1.17 (1.01-1.37)                                           | 1.30 (1.12-1.52)     | 1.36 (1.16-1.59)     | 1.54 (1.31-1.82) | <0.0001              |                            |  |
| Circulatory                | 1                        | 1.05 (0.88-1.24)                                           | 1.01 (0.85-1.21)     | 1.17 (0.98-1.39)     | 1.33 (1.11-1.60) | 0.0002               |                            |  |
| Respiratory                | 1                        | 1.71 (1.11-2.65)                                           | 1.69 (1.08-2.65)     | 2.35 (1.52-3.65)     | 3.32 (2.12-5.21) | <0.0001              |                            |  |
| Other                      | 1                        | 1.20 (0.96-1.50)                                           | 1.50 (1.20-1.87)     | 1.58 (1.25-1.98)     | 2.07 (1.63-2.62) | <0.0001              |                            |  |
|                            |                          | <b>Women</b>                                               |                      |                      |                  |                      |                            |  |
| <b>Waist-hip-ratio</b>     | <b>&lt;0.73</b>          | <b>0.73-&lt;0.77</b>                                       | <b>0.77-&lt;0.80</b> | <b>0.80-&lt;0.85</b> | <b>≥0.85</b>     |                      |                            |  |
| Number of deaths           | 782                      | 1077                                                       | 1271                 | 1548                 | 2185             |                      |                            |  |
| Crude relative risk‡       | 1                        | 1.09 (0.99-1.19)                                           | 1.12 (1.02-1.22)     | 1.25 (1.15-1.37)     | 1.63 (1.49-1.78) | <0.0001              |                            |  |
| Multivariable adjusted RR§ |                          |                                                            |                      |                      |                  |                      |                            |  |
| without BMI                | 1                        | 1.06 (0.97-1.16)                                           | 1.07 (0.97-1.17)     | 1.16 (1.06-1.27)     | 1.45 (1.33-1.58) | <0.0001              |                            |  |
| with BMI                   | 1                        | 1.09 (0.99-1.20)                                           | 1.12 (1.02-1.22)     | 1.23 (1.12-1.34)     | 1.51 (1.37-1.66) | <0.0001              |                            |  |
|                            |                          | <b>Multivariable adjusted relative risks in subgroups§</b> |                      |                      |                  |                      |                            |  |
| <b>BMI tertiles</b>        |                          |                                                            |                      |                      |                  |                      | <b>0.05</b>                |  |
| <23.0                      | 1                        | 1.08 (0.94-1.23)                                           | 1.16 (1.00-1.33)     | 1.35 (1.16-1.57)     | 1.69 (1.42-2.02) | <0.0001              |                            |  |
| 23.0-<26.6                 | 1                        | 1.00 (0.86-1.18)                                           | 0.98 (0.84-1.14)     | 1.03 (0.88-1.20)     | 1.36 (1.16-1.60) | <0.0001              |                            |  |
| ≥26.6                      | 1                        | 1.21 (0.94-1.56)                                           | 1.21 (0.96-1.53)     | 1.32 (1.05-1.65)     | 1.60 (1.28-1.99) | <0.0001              |                            |  |
| <b>Smoking status¶</b>     |                          |                                                            |                      |                      |                  |                      | <b>0.57</b>                |  |
| Never smoker               | 1                        | 1.05 (0.92-1.20)                                           | 1.04 (0.91-1.20)     | 1.14 (0.99-1.31)     | 1.38 (1.21-1.59) | <0.0001              |                            |  |
| Former smoker              | 1                        | 1.06 (0.88-1.27)                                           | 1.03 (0.85-1.24)     | 1.11 (0.92-1.34)     | 1.46 (1.21-1.77) | <0.0001              |                            |  |
| Current smoker             | 1                        | 1.22 (1.01-1.46)                                           | 1.37 (1.15-1.65)     | 1.61 (1.35-1.93)     | 2.02 (1.68-2.42) | <0.0001              |                            |  |

(Table continued on next page)

(Table continued from previous page)

|                       | Waist-hip-ratio quintile |                  |                  |                  |                  | P <sub>trend</sub> * | P <sub>interaction</sub> † |
|-----------------------|--------------------------|------------------|------------------|------------------|------------------|----------------------|----------------------------|
|                       | 1                        | 2                | 3                | 4                | 5                |                      |                            |
| <b>Age category</b>   |                          |                  |                  |                  |                  |                      | <b>0.62</b>                |
| <55 years             | 1                        | 1.19 (1.03-1.38) | 1.09 (0.93-1.27) | 1.18 (1.01-1.39) | 1.48 (1.25-1.75) | <0.0001              |                            |
| 55-65 years           | 1                        | 0.97 (0.84-1.13) | 1.08 (0.94-1.24) | 1.20 (1.04-1.38) | 1.45 (1.26-1.67) | <0.0001              |                            |
| ≥65 years             | 1                        | 1.15 (0.92-1.44) | 1.20 (0.97-1.49) | 1.29 (1.05-1.59) | 1.63 (1.32-2.00) | <0.0001              |                            |
| <b>Follow-up</b> ‡    |                          |                  |                  |                  |                  |                      | <b>0.20</b>                |
| ≤5 years              | 1                        | 1.13 (0.95-1.34) | 1.16 (0.98-1.38) | 1.21 (1.02-1.43) | 1.67 (1.41-1.98) | <0.0001              |                            |
| >5 years              | 1                        | 1.07 (0.96-1.20) | 1.10 (0.98-1.22) | 1.23 (1.10-1.38) | 1.43 (1.28-1.60) | <0.0001              |                            |
| <b>Cause of death</b> |                          |                  |                  |                  |                  |                      | <b>0.0001</b>              |
| Cancer                | 1                        | 1.03 (0.90-1.18) | 1.04 (0.91-1.19) | 1.09 (0.95-1.25) | 1.23 (1.07-1.42) | 0.001                |                            |
| Circulatory           | 1                        | 1.04 (0.82-1.33) | 1.15 (0.92-1.45) | 1.28 (1.02-1.61) | 1.72 (1.37-2.16) | <0.0001              |                            |
| Respiratory           | 1                        | 1.81 (1.01-3.24) | 2.13 (1.21-3.73) | 2.18 (1.24-3.83) | 3.30 (1.88-5.78) | <0.0001              |                            |
| Other                 | 1                        | 1.35 (1.05-1.73) | 1.29 (1.00-1.66) | 1.44 (1.12-1.86) | 2.07 (1.61-2.67) | <0.0001              |                            |

\*p-value for trend based on median waist-hip-ratio within quintiles

†p-value for the likelihood ratio test of comparing the model with interaction terms between waist-hip-ratio and the stratification variable to the model without these interaction terms (8 degrees of freedom each for BMI, smoking, age, and cause of death, 4 degrees of freedom each for preexisting disease and length of follow-up); for cause of death and length of follow-up the data augmentation method described by Lunn and McNeil was used (see statistical methods for details)

‡Crude relative risk calculated using Cox proportional hazard regression using age as the underlying time variable and stratified by center and age at recruitment

§Multivariable adjusted models were based on the crude model with additional adjustment for smoking (never, former with quit≥10y, former with quit<10y, former with time since quit unknown, current with <15 cig/d, current with 15-24 cig/d, current with ≥25 cig/d, current with number of cig unknown, and missing); education (no school degree, primary school degree, technical or professional school degree, secondary school degree, university degree, and missing); alcohol consumption (nondrinker, 0.1-4.9 g/d, 5.0-14.9 g/d, 15.0-29.9 g/d, and ≥30 g/d), activity (inactive, moderately inactive, moderately active, active, and missing), height (quintiles), and BMI (<18.5, 18.5-<21.0, 21.0-<23.5, 23.5-<25.0, 25.0-<26.5, 26.5-<28.0, 28.0-<30.0, 30.0-<35.0, ≥35.0)

¶Relative risks in strata of smoking status are not adjusted for smoking status

|| Follow-up  $\leq 5$  years indicates that follow-up time of all participants was censored after 5 years (i.e., only death occurring during the first 5 years are considered). Follow-up  $> 5$  years indicates that person-time and incident events from the first 5 years of follow-up were excluded (i.e., that analysis includes only those deaths that occurred after more than 5 years of follow-up)

**Supplementary Table 4:** Measures of calibration, discrimination, and reclassification for different multivariable adjusted models to predict 5-year risk of death\*

|                                   | Model with BMI | Model with BMI and waist circumference | Model with BMI and waist-hip-ratio |
|-----------------------------------|----------------|----------------------------------------|------------------------------------|
| <b>Men</b>                        |                |                                        |                                    |
| Nagelkerke's $R^2$ †, %           | 15.52          | 15.70                                  | 15.68                              |
| Hosmer-Lemeshow statistic‡        |                |                                        |                                    |
| $\chi^2$                          | 11.91          | 14.18                                  | 10.09                              |
| p-value                           | 0.155          | 0.077                                  | 0.259                              |
| C-statistic§                      | 0.7948         | 0.7961¶                                | 0.7964¶,                           |
| Net reclassification index**      | -              | 0.00487<br>(p=0.41)                    | 0.00042<br>(p=0.95)                |
| Integrated discrimination index†† | -              | 0.00095<br>(p<0.0001)                  | 0.00075<br>(p=0.004)               |
| <b>Women</b>                      |                |                                        |                                    |
| Nagelkerke's $R^2$ †, %           | 12.77          | 12.94                                  | 13.02                              |
| Hosmer-Lemeshow statistic‡        |                |                                        |                                    |
| $\chi^2$                          | 2.46           | 4.946                                  | 4.485                              |
| p-value                           | 0.963          | 0.763                                  | 0.811                              |
| C-statistic§                      | 0.7977         | 0.7990¶                                | 0.7995¶,                           |
| Net reclassification index**      | -              | 0.00674<br>(p=0.30)                    | 0.02271<br>(p=0.004)               |
| Integrated discrimination index†† | -              | 0.00075<br>(p<0.0001)                  | 0.00099<br>(p<0.0001)              |

\*The multivariable logistic model includes age (5-year categories), center, smoking (never, former with quit $\geq$ 10y, former with quit<10y, former with time since quit unknown, current with <15 cig/d, current with 15-24 cig/d, current with  $\geq$ 25 cig/d, current with number of cig unknown, and missing); education (no school degree, primary school degree, technical or professional school degree, secondary school degree, university degree, and missing); alcohol consumption (nondrinker, 0.1-4.9 g/d, 5.0-14.9 g/d, 15.0-29.9 g/d, and  $\geq$ 30 g/d), activity (inactive, moderately inactive, moderately active, active, and missing), height (quintiles), and BMI (<18.5, 18.5-<21.0, 21.0-<23.5, 23.5-<25.0, 25.0-<26.5, 26.5-<28.0, 28.0-<30.0, 30.0-<35.0,  $\geq$ 35.0)

When using quintiles for BMI, models including either BMI or waist circumference or waist-hip-ratio showed equal discrimination (c-statistic for each model 0.793; p>0.05), while for women, the c-statistic of models including waist circumference (0.798) or waist-hip-ratio (0.799) was significantly higher than that with BMI (0.797; p<0.05 for comparisons with circumference measures).

†Nagelkerke's  $R^2$  is a measure of the fraction of the -2 log likelihood explained by the predictors, analogous to the percentage of variance explained in a linear model, ranging from 0% to 100% (1).

‡The Hosmer-Lemeshow statistic is a measure of model calibration, comparing predicted and observed probabilities of death based on deciles of predicted risk. Smaller  $\chi^2$  values and larger p-values indicate better calibration. P-values <0.05 indicate significant lack of fit (2).

§ The c-statistic is a measure of discrimination, reflecting the probability the model assigns a higher risk to those who died within 5 years than to those who did not. The c-statistic ranges from 0.5 (no discriminative ability) to 1.0 (perfect discrimination) (3).

¶  $p < 0.05$  versus model without waist circumference or waist-hip-ratio

||  $p > 0.05$  versus model with waist circumference

\*\* The net reclassification index quantifies the improvement in risk classification (based on the pre-defined risk categories used in Table 4 and Supplementary Table 4) when waist circumference or waist-hip-ratio are added to the model including BMI. It is the sum of differences in proportions of participants moving up minus the proportion moving down for participants who developed events, and the proportion of participants moving down minus the proportion moving up for participants who did not develop events (4). Clearly, this index depends on the choice of risk categories.

†† The integrated discrimination index does not depend on the choice of risk categories and quantifies jointly the overall improvement in sensitivity and specificity. It is calculated as the difference between the integrated difference in sensitivities and the integrated difference in 'one minus specificities' (4).

**Supplementary Table 5:** Expected and observed 5-year risk of death using the multivariable adjusted model with and without waist-hip-ratio\*

| <b>Men</b>                                                               | <b>5-year risk by model with BMI</b> | <b>5-year risk by model with BMI and WHR</b> |                      |                      |              | <b>Total reclassified</b> |
|--------------------------------------------------------------------------|--------------------------------------|----------------------------------------------|----------------------|----------------------|--------------|---------------------------|
|                                                                          |                                      | <b>&lt;2.5%</b>                              | <b>2.5%-&lt;5.0%</b> | <b>5.0%-&lt;7.5%</b> | <b>≥7.5%</b> |                           |
| <b>&lt;2.5%</b>                                                          |                                      |                                              |                      |                      |              |                           |
| Total participants, n                                                    | 86,036                               | 1833                                         | 0                    | 0                    |              |                           |
| Participants classified in each stratum by the model with BMI and WHR, % | 97.91                                | 2.09                                         | 0.00                 | 0.00                 |              | 2.09                      |
| Observed 5-year risk, %                                                  | 0.90                                 | 2.89                                         | -                    | -                    |              |                           |
| <b>2.5%-&lt;5.0%</b>                                                     |                                      |                                              |                      |                      |              |                           |
| Total participants, n                                                    | 2045                                 | 17,252                                       | 1000                 | 0                    |              |                           |
| Participants classified in each stratum by the model with BMI and WHR, % | 10.08                                | 85.00                                        | 4.93                 | 0                    |              | 15.01                     |
| Observed 5-year risk, %                                                  | 2.49                                 | 3.52                                         | 4.30                 | .                    |              |                           |
| <b>5.0%-&lt;7.5%</b>                                                     |                                      |                                              |                      |                      |              |                           |
| Total participants, n                                                    | 0                                    | 929                                          | 4964                 | 574                  |              |                           |
| Participants classified in each stratum by the model with BMI and WHR, % | 0                                    | 14.37                                        | 76.76                | 8.88                 |              | 23.25                     |
| Observed 5-year risk, %                                                  | -                                    | 5.06                                         | 6.89                 | 8.19                 |              |                           |
| <b>≥7.5%</b>                                                             |                                      |                                              |                      |                      |              |                           |
| Total participants, n                                                    | 0                                    | 0                                            | 568                  | 5637                 |              |                           |
| Participants classified in each stratum by the model with BMI and WHR, % | 0                                    | 0                                            | 9.15                 | 80.85                |              | 9.15                      |
| Observed 5-year risk, %                                                  | -                                    | -                                            | 8.27                 | 14.17                |              |                           |

*(Table continued on next page)*

(Table continued from previous page)

| Women<br>5 year-risk by model with BMI                                   | 5-year risk by model with BMI and WHR |              |              |        | Total reclassified |
|--------------------------------------------------------------------------|---------------------------------------|--------------|--------------|--------|--------------------|
|                                                                          | <1.25%                                | 1.25%-<2.50% | 2.50%-<3.75% | ≥3.75% |                    |
| <b>&lt;1.25%</b>                                                         |                                       |              |              |        |                    |
| Total participants, n                                                    | 178,984                               | 4057         | 0            | 0      |                    |
| Participants classified in each stratum by the model with BMI and WHR, % | 97.78                                 | 2.22         | 0.00         | 0.00   | 2.22               |
| Observed 5-year risk, %                                                  | 0.41                                  | 1.33         | -            | -      |                    |
| <b>1.25%-2.50%</b>                                                       |                                       |              |              |        |                    |
| Total participants, n                                                    | 3826                                  | 24,529       | 2077         | 0      |                    |
| Participants classified in each stratum by the model with BMI and WHR, % | 12.57                                 | 80.60        | 6.83         | 0.00   | 19.40              |
| Observed 5-year risk, %                                                  | 1.28                                  | 1.70         | 2.55         | -      |                    |
| <b>2.50%-&lt;3.75%</b>                                                   |                                       |              |              |        |                    |
| Total participants, n                                                    | 0                                     | 1982         | 6199         | 1227   |                    |
| Participants classified in each stratum by the model with BMI and WHR, % | 0                                     | 21.07        | 65.89        | 13.04  | 34.11              |
| Observed 5-year risk, %                                                  | -                                     | 1.56         | 2.73         | 5.30   |                    |
| <b>≥3.75%</b>                                                            |                                       |              |              |        |                    |
| Total participants, n                                                    | 0                                     | 0            | 1225         | 7977   |                    |
| Participants classified in each stratum by the model with BMI and WHR, % | 0.00                                  | 0.00         | 13.31        | 86.69  | 13.31              |
| Observed 5-year risk, %                                                  | -                                     | -            | 3.27         | 7.06   |                    |

\*The multivariable logistic model includes age (5-year categories), center, smoking (never, former with quit≥10y, former with quit<10y, former with time since quit unknown, current with <15 cig/d, current with 15-24 cig/d, current with ≥25 cig/d, current with number of cig unknown, and missing); education (no school degree, primary school degree, technical or professional school degree, secondary school degree, university degree,

and missing); alcohol consumption (nondrinker, 0.1-4.9 g/d, 5.0-14.9 g/d, 15.0-29.9 g/d, and  $\geq 30$  g/d), activity (inactive, moderately inactive, moderately active, active, and missing), height (quintiles), and BMI ( $<18.5$ ,  $18.5-<21.0$ ,  $21.0-<23.5$ ,  $23.5-<25.0$ ,  $25.0-<26.5$ ,  $26.5-<28.0$ ,  $28.0-<30.0$ ,  $30.0-<35.0$ ,  $\geq 35.0$ )

**Supplementary Table 6:** Relative risk of death from major causes according to BMI in men and women in the European Prospective Investigation into Cancer and Nutrition (EPIC)\*

|                         | BMI              |                  |                  |            |                  |                  |                  |                  | P <sub>LRT</sub> † |              |
|-------------------------|------------------|------------------|------------------|------------|------------------|------------------|------------------|------------------|--------------------|--------------|
|                         | <18.5            | 18.5-<21.0       | 21.0-<23.5       | 23.5-<25.0 | 25.0-<26.5       | 26.5-<28.0       | 28.0-<30.0       | 30.0-<35.0       |                    | ≥35.0        |
| <b>Men</b>              |                  |                  |                  |            |                  |                  |                  |                  |                    |              |
| <b>Cause of death</b>   |                  |                  |                  |            |                  |                  |                  |                  |                    |              |
| Ischemic heart disease  | 1.17 (0.54-2.56) | 1.10 (0.77-1.57) | 1.02 (0.80-1.31) | 1.00       | 1.11 (0.89-1.40) | 1.13 (0.89-1.43) | 1.50 (1.20-1.88) | 1.72 (1.37-2.16) | 2.64 (1.86-3.73)   | <0.0001      |
| Cerebrovascular disease | 1.41 (0.49-4.12) | 1.39 (0.78-2.46) | 0.90 (0.58-1.39) | 1.00       | 0.99 (0.66-1.49) | 1.14 (0.76-1.70) | 0.88 (0.58-1.36) | 1.27 (0.84-1.92) | 1.86 (0.97-3.58)   | <b>0.30</b>  |
| Colorectal cancer       | ‡                | 1.64 (0.74-3.67) | 1.83 (1.10-3.05) | 1.00       | 1.22 (0.73-2.04) | 1.95 (1.21-3.16) | 2.13 (1.32-3.44) | 2.66 (1.65-4.29) | 2.55 (1.17-5.57)   | <b>0.002</b> |
| Lung cancer             | 1.52 (0.70-3.32) | 1.29 (0.91-1.83) | 0.74 (0.56-0.98) | 1.00       | 0.72 (0.55-0.94) | 0.63 (0.48-0.83) | 0.56 (0.42-0.75) | 0.55 (0.41-0.74) | 0.56 (0.31-1.00)   | <0.0001      |
| Prostate cancer         | 0.52 (0.07-4.14) | 1.11 (0.52-2.37) | 0.95 (0.57-1.58) | 1.00       | 0.97 (0.60-1.57) | 0.96 (0.58-1.60) | 0.93 (0.55-1.59) | 1.07 (0.62-1.85) | 2.04 (0.83-4.99)   | <b>0.88</b>  |
| <b>Women</b>            |                  |                  |                  |            |                  |                  |                  |                  |                    |              |
| <b>Cause of death</b>   |                  |                  |                  |            |                  |                  |                  |                  |                    |              |
| Ischemic heart disease  | 1.02 (0.44-2.39) | 0.88 (0.55-1.40) | 1.02 (0.72-1.44) | 1.00       | 1.26 (0.87-1.81) | 1.27 (0.87-1.86) | 1.58 (1.10-2.28) | 1.44 (1.00-2.07) | 3.28 (2.20-4.89)   | <0.0001      |
| Cerebrovascular disease | 1.02 (0.44-2.38) | 1.16 (0.78-1.73) | 1.18 (0.86-1.62) | 1.00       | 0.94 (0.65-1.36) | 1.00 (0.68-1.45) | 1.06 (0.73-1.54) | 0.97 (0.67-1.40) | 1.40 (0.88-2.24)   | <b>0.76</b>  |
| Breast cancer           | 1.11 (0.47-2.60) | 0.87 (0.56-1.35) | 0.79 (0.55-1.13) | 1.00       | 1.12 (0.76-1.66) | 1.38 (0.93-2.06) | 1.62 (1.09-2.40) | 1.55 (1.05-2.28) | 1.79 (1.07-2.99)   | <b>0.002</b> |
| Colorectal cancer       | 0.52 (0.16-1.65) | 0.88 (0.57-1.36) | 0.64 (0.45-0.91) | 1.00       | 0.60 (0.40-0.91) | 0.75 (0.49-1.13) | 1.02 (0.69-1.51) | 0.64 (0.41-0.98) | 1.14 (0.67-1.94)   | <b>0.03</b>  |
| Lung cancer             | 0.71 (0.29-1.79) | 1.51 (1.04-2.19) | 1.23 (0.90-1.70) | 1.00       | 0.93 (0.64-1.36) | 0.95 (0.64-1.41) | 0.91 (0.60-1.32) | 0.86 (0.56-1.32) | 0.83 (0.42-1.64)   | <b>0.09</b>  |

\*Multivariable adjusted relative risks calculated using Cox proportional hazard regression using age as the underlying time variable and stratified by center and age at recruitment with additional adjustment for smoking (never, former with quit ≥10y, former with quit <10y, former with time since quit unknown, current with <15 cig/d, current with 15-24 cig/d, current with ≥25 cig/d, current with number of cig unknown, and missing); education (no school degree, primary school degree, technical or professional school degree, secondary school degree, university degree, and missing); alcohol consumption (nondrinker, 0.1-4.9 g/d, 5.0-14.9 g/d, 15.0-29.9 g/d, and ≥30 g/d), activity (inactive, moderately inactive, moderately active, active, and missing), and height (quintiles). All covariates were entered using dummy coding into the models.

†p-value for the likelihood ratio test of comparing the model with BMI categories to the model without BMI categories with 8 degrees of freedom

‡not estimable because the number of incident cases was too low in this category

**Supplementary Table 7:** Relative risk of death from major causes according to quintiles of waist circumference in men and women in the European Prospective Investigation into Cancer and Nutrition (EPIC)

|                         | Waist circumference quintile |                      |                      |                       |                  | P <sub>trend</sub> † |
|-------------------------|------------------------------|----------------------|----------------------|-----------------------|------------------|----------------------|
|                         | 1                            | 2                    | 3                    | 4                     | 5                |                      |
| <b>Men</b>              |                              |                      |                      |                       |                  |                      |
| <b>Waist, cm</b>        | <b>&lt;86.0</b>              | <b>86.0-&lt;91.5</b> | <b>91.5-&lt;96.5</b> | <b>96.5-&lt;102.7</b> | <b>≥102.7</b>    |                      |
| Ischemic heart disease  | 1                            | 1.32 (1.02-1.70)     | 1.35 (1.02-1.80)     | 1.63 (1.19-2.22)      | 1.68 (1.18-2.39) | <b>0.008</b>         |
| Cerebrovascular disease | 1                            | 1.10 (0.71-1.70)     | 1.09 (0.67-1.79)     | 1.47 (0.86-2.49)      | 1.38 (0.74-2.58) | <b>0.26</b>          |
| Colorectal cancer       | 1                            | 1.17 (0.69-1.98)     | 1.26 (0.70-2.25)     | 1.34 (0.71-2.54)      | 1.90 (0.94-3.84) | <b>0.04</b>          |
| Lung cancer             | 1                            | 1.20 (0.88-1.65)     | 1.78 (1.27-2.49)     | 2.04 (1.38-3.00)      | 2.92 (1.87-4.57) | <b>&lt;0.0001</b>    |
| Prostate cancer         | 1                            | 1.34 (0.77-2.35)     | 1.26 (0.66-2.42)     | 1.93 (0.96-3.89)      | 3.02 (1.36-6.72) | <b>0.004</b>         |
| <b>Women</b>            |                              |                      |                      |                       |                  |                      |
| <b>Waist, cm</b>        | <b>&lt;70.1</b>              | <b>70.1-&lt;75.6</b> | <b>75.6-&lt;81.0</b> | <b>81.0-&lt;89.0</b>  | <b>≥89.0</b>     |                      |
| Ischemic heart disease  | 1                            | 1.32 (0.86-2.03)     | 1.15 (0.73-1.83)     | 1.46 (0.89-2.39)      | 2.16 (1.26-3.70) | <b>0.001</b>         |
| Cerebrovascular disease | 1                            | 1.14 (0.77-1.70)     | 1.09 (0.71-1.68)     | 1.64 (1.03-2.60)      | 2.05 (1.21-3.47) | <b>0.002</b>         |
| Breast cancer           | 1                            | 1.11 (0.75-1.64)     | 0.79 (0.50-1.25)     | 0.95 (0.58-1.56)      | 1.08 (0.61-1.91) | <b>0.67</b>          |
| Colorectal cancer       | 1                            | 1.02 (0.66-1.58)     | 0.89 (0.55-1.45)     | 0.97 (0.56-1.66)      | 1.00 (0.53-1.88) | <b>0.95</b>          |
| Lung cancer             | 1                            | 1.09 (0.76-1.55)     | 1.10 (0.74-1.63)     | 1.21 (0.77-1.90)      | 1.47 (0.86-2.51) | <b>0.15</b>          |

\*Multivariable adjusted relative risks calculated using Cox proportional hazard regression using age as the underlying time variable and stratified by center and age at recruitment with additional adjustment for smoking (never, former with quit≥10y, former with quit<10y, former with time since quit unknown, current with <15 cig/d, current with 15-24 cig/d, current with ≥25 cig/d, current with number of cig unknown, and missing); education (no school degree, primary school degree, technical or professional school degree, secondary school degree, university degree, and missing); alcohol consumption (nondrinker, 0.1-4.9 g/d, 5.0-14.9 g/d, 15.0-29.9 g/d, and ≥30 g/d), activity (inactive, moderately inactive, moderately active, active, and missing), height (quintiles), and BMI (<18.5, 18.5-<21.0, 21.0-<23.5, 23.5-<25.0, 25.0-<26.5, 26.5-<28.0, 28.0-<30.0, 30.0-<35.0, ≥35.0)

†p-value for trend based on median waist circumference within quintiles

**Supplementary Table 8:** Relative risk of death from major causes according to quintiles of waist-hip-ratio in men and women in the European Prospective Investigation into Cancer and Nutrition (EPIC)

|                         | Waist-hip-ratio quintile |                      |                      |                      |                  | P <sub>trend</sub> * |
|-------------------------|--------------------------|----------------------|----------------------|----------------------|------------------|----------------------|
|                         | 1                        | 2                    | 3                    | 4                    | 5                |                      |
|                         | <b>Men</b>               |                      |                      |                      |                  |                      |
| <b>Waist-hip-ratio</b>  | <b>&lt;0.89</b>          | <b>0.89-&lt;0.92</b> | <b>0.92-&lt;0.95</b> | <b>0.95-&lt;0.99</b> | <b>≥0.99</b>     |                      |
| Ischemic heart disease  | 1                        | 0.84 (0.67-1.06)     | 0.85 (0.67-1.08)     | 1.04 (0.82-1.31)     | 1.08 (0.85-1.38) | 0.12                 |
| Cerebrovascular disease | 1                        | 1.24 (0.82-1.88)     | 1.08 (0.70-1.66)     | 1.04 (0.67-1.62)     | 1.24 (0.79-1.96) | 0.54                 |
| Colorectal cancer       | 1                        | 1.51 (0.91-2.51)     | 1.52 (0.91-2.56)     | 1.84 (1.10-3.09)     | 2.15 (1.27-3.66) | 0.004                |
| Lung cancer             | 1                        | 1.13 (0.82-1.56)     | 1.41 (1.04-1.92)     | 1.50 (1.10-2.06)     | 1.76 (1.27-2.46) | 0.0002               |
| Prostate cancer         | 1                        | 1.33 (0.76-2.33)     | 1.81 (1.06-3.11)     | 1.10 (0.60-2.02)     | 1.94 (1.07-3.52) | 0.06                 |
|                         | <b>Women</b>             |                      |                      |                      |                  |                      |
| <b>Waist-hip-ratio</b>  | <b>&lt;0.73</b>          | <b>0.73-&lt;0.77</b> | <b>0.77-&lt;0.80</b> | <b>0.80-&lt;0.85</b> | <b>≥0.85</b>     |                      |
| Ischemic heart disease  | 1                        | 0.99 (0.65-1.52)     | 0.96 (0.63-1.44)     | 1.31 (0.88-1.94)     | 1.56 (1.05-1.94) | 0.0006               |
| Cerebrovascular disease | 1                        | 1.33 (0.87-2.05)     | 1.57 (1.04-2.36)     | 1.64 (1.09-2.47)     | 1.96 (1.30-2.97) | 0.0009               |
| Breast cancer           | 1                        | 0.83 (0.59-1.17)     | 0.80 (0.57-1.14)     | 0.78 (0.54-1.11)     | 0.99 (0.69-1.41) | 0.89                 |
| Colorectal cancer       | 1                        | 0.99 (0.65-1.49)     | 1.13 (0.76-1.68)     | 1.00 (0.66-1.52)     | 1.18 (0.77-1.81) | 0.43                 |
| Lung cancer             | 1                        | 1.32 (0.88-1.96)     | 1.55 (1.05-2.29)     | 1.46 (0.97-2.18)     | 2.06 (1.37-3.09) | 0.0004               |

\*Multivariable adjusted relative risks calculated using Cox proportional hazard regression using age as the underlying time variable and stratified by center and age at recruitment with additional adjustment for smoking (never, former with quit $\geq$ 10y, former with quit $<$ 10y, former with time since quit unknown, current with  $<$ 15 cig/d, current with 15-24 cig/d, current with  $\geq$ 25 cig/d, current with number of cig unknown, and missing); education (no school degree, primary school degree, technical or professional school degree, secondary school degree, university degree, and missing); alcohol consumption (nondrinker, 0.1-4.9 g/d, 5.0-14.9 g/d, 15.0-29.9 g/d, and  $\geq$ 30 g/d), activity (inactive, moderately inactive, moderately active, active, and missing), height (quintiles), and BMI ( $<$ 18.5, 18.5- $<$ 21.0, 21.0- $<$ 23.5, 23.5- $<$ 25.0, 25.0- $<$ 26.5, 26.5- $<$ 28.0, 28.0- $<$ 30.0, 30.0- $<$ 35.0,  $\geq$ 35.0)

†p-value for trend based on median waist-hip-ratio within quintiles

## References

1. Nagelkerke NJD. A note on a general definition of the coefficient of determination. *Biometrika* 1991;78(3):691-2.
2. Hosmer DW, Lemeshow S. *Applied logistic regression*. 2 ed. New York: John Wiley & Sons, Inc.; 2000.
3. Hanley JA, McNeil BJ. The meaning and use of the area under a receiver operating characteristic (ROC) curve. *Radiology* 1982;143(1):29-36.
4. Pencina MJ, D'Agostino RB S, D'Agostino RB J, Vasan RS. Evaluating the added predictive ability of a new marker: From area under the ROC curve to reclassification and beyond. *Stat Med* 2008;27(2):157-72.

### **Supplementary Figure 1**

Label:

Multivariable adjusted relative risk of death in men (Panels A) and women (Panel B) according to BMI categories (18.5-<25.0; 25.0-<30.0;  $\geq$ 30.0) and quintiles of waist-hip-ratio.

Footnote:

Symbols indicate relative risks and error bars indicate 95%-confidence intervals. The reference category represents participants in the middle category of BMI and the bottom quintile of waist-hip-ratio. Age was used as the underlying time variable in the regression models with stratification by center and age at recruitment and additional adjustment for smoking, education, alcohol consumption, physical activity, and height.

### **Supplementary Figure 2**

Label:

Multivariable adjusted relative risk of death in men (Panels A, B and C) and women (Panels D, E and F) who never smoked according to BMI (Panels A and D), waist circumference (Panels B and E) and waist-hip-ratio (Panels C and F) in EPIC.

Footnote:

Solid lines indicate relative risks and dashed lines indicate 95%-confidence intervals derived from restricted cubic spline regression with knots placed at the 5<sup>th</sup>, 25<sup>th</sup>, 75<sup>th</sup>, and 95<sup>th</sup> percentile of the sex-specific distribution of each anthropometric variable. The reference point for BMI is the midpoint of the reference group (23.5-<25.0) from categorical analysis. The reference points for waist circumference and waist-hip-ratio are the sex-specific medians of these variables. The graphic displays are truncated at the 1<sup>st</sup> and 99<sup>th</sup> percentiles. Age was used as the underlying time variable in the regression models with stratification by center and age at recruitment and additional adjustment for smoking, education, alcohol consumption, physical activity, and height.

### **Supplementary Figure 3**

Label:

Multivariable adjusted relative risk of death in men (Panels A and B) and women (Panels C and D) who never smoked according to waist circumference (Panels A and C) and waist-hip-ratio (Panels B and D) after adjustment for BMI in EPIC.

Footnote:

Solid lines indicate relative risks and dashed lines indicate 95%-confidence intervals derived from restricted cubic spline regression with knots placed at the 5<sup>th</sup>, 25<sup>th</sup>, 75<sup>th</sup>, and 95<sup>th</sup> percentile of the sex-specific distribution of each anthropometric variable. The reference points for waist circumference and waist-hip-ratio are the sex-specific medians of these variables. The graphic displays are truncated at the 1<sup>st</sup> and 99<sup>th</sup> percentiles. Age was used as the underlying time variable in the regression models with stratification by center and age at recruitment and additional adjustment for smoking, education, alcohol consumption, physical activity, height, and BMI.

#### **Supplementary Figure 4**

Label:

Multivariable adjusted relative risk of death in men (Panels A and B) and women (Panels C and D) who never smoked according to tertiles of BMI and quintiles of waist circumference (Panels A and C) or waist-hip-ratio (Panels B and D), respectively.

Footnote:

Note that the scale of the y-axis differs from the other figures. Symbols indicate relative risks and error bars indicate 95%-confidence intervals. The reference category represents participants in the middle tertile of BMI and the bottom quintile of waist circumference or waist-hip-ratio, respectively. Age was used as the underlying time variable in the regression models with stratification by center and age at recruitment and additional adjustment for smoking, education, alcohol consumption, physical activity, and height.

\*The upper boundary of the 95%-confidence intervals for the relative risk of men in the lowest tertile of BMI and the highest quintile of waist circumference was 13.27.

#### **Supplementary Figure 5**

Label:

Cause-specific multivariable adjusted relative risk of death in men (Panels A, B and C) and women (Panels D, E and F) according to BMI (Panels A and D), waist circumference (Panels B and E) and waist-hip-ratio (Panels C and F) in EPIC.

Footnote:

Lines indicate relative risks of death according to the underlying causes as indicated, derived from restricted cubic spline regression with knots placed at the 5<sup>th</sup>, 25<sup>th</sup>, 75<sup>th</sup>, and 95<sup>th</sup> percentile of the sex-specific distribution of each anthropometric variable. The reference point for BMI is the midpoint of the reference group (23.5-<25.0) from categorical analysis. The reference points for waist circumference and waist-hip-ratio are the sex-specific medians of these variables. The graphic displays are truncated at the 1<sup>st</sup> and 99<sup>th</sup> percentiles. Age was used as the underlying time variable in the regression models with stratification by center and age at recruitment and additional adjustment for smoking, education, alcohol consumption, activity, and height. Models for waist circumference and waist-hip-ratio were additionally adjusted for BMI.

# Supplementary Figure 1

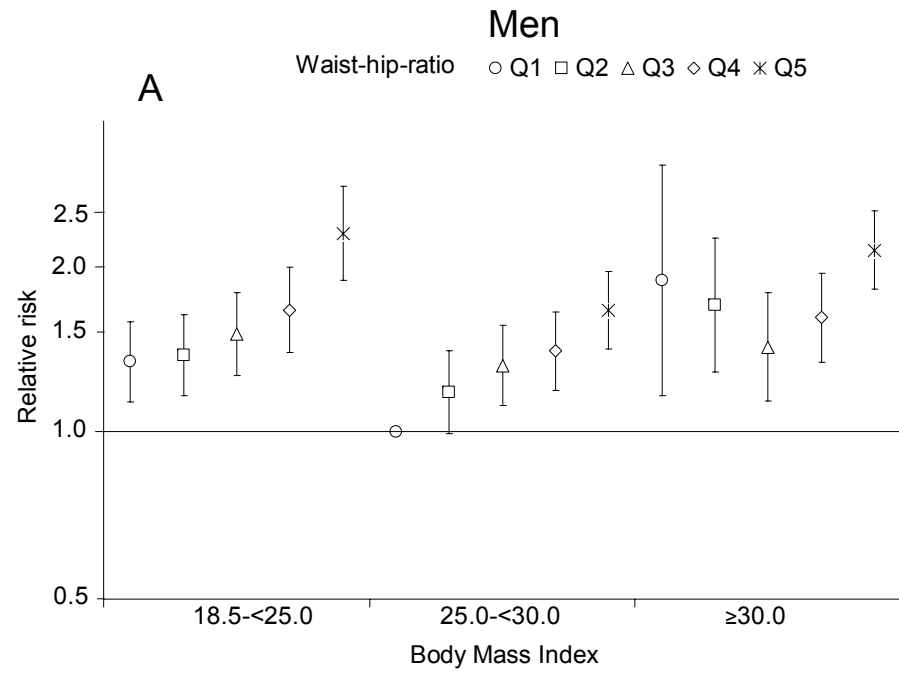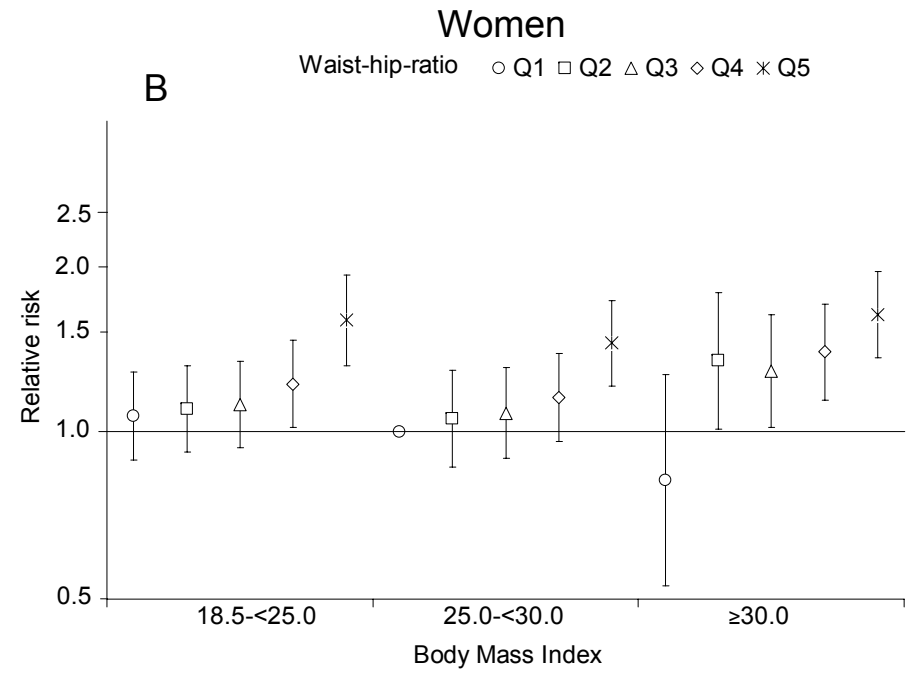

# Supplementary Figure 2

## Men (never smokers only)

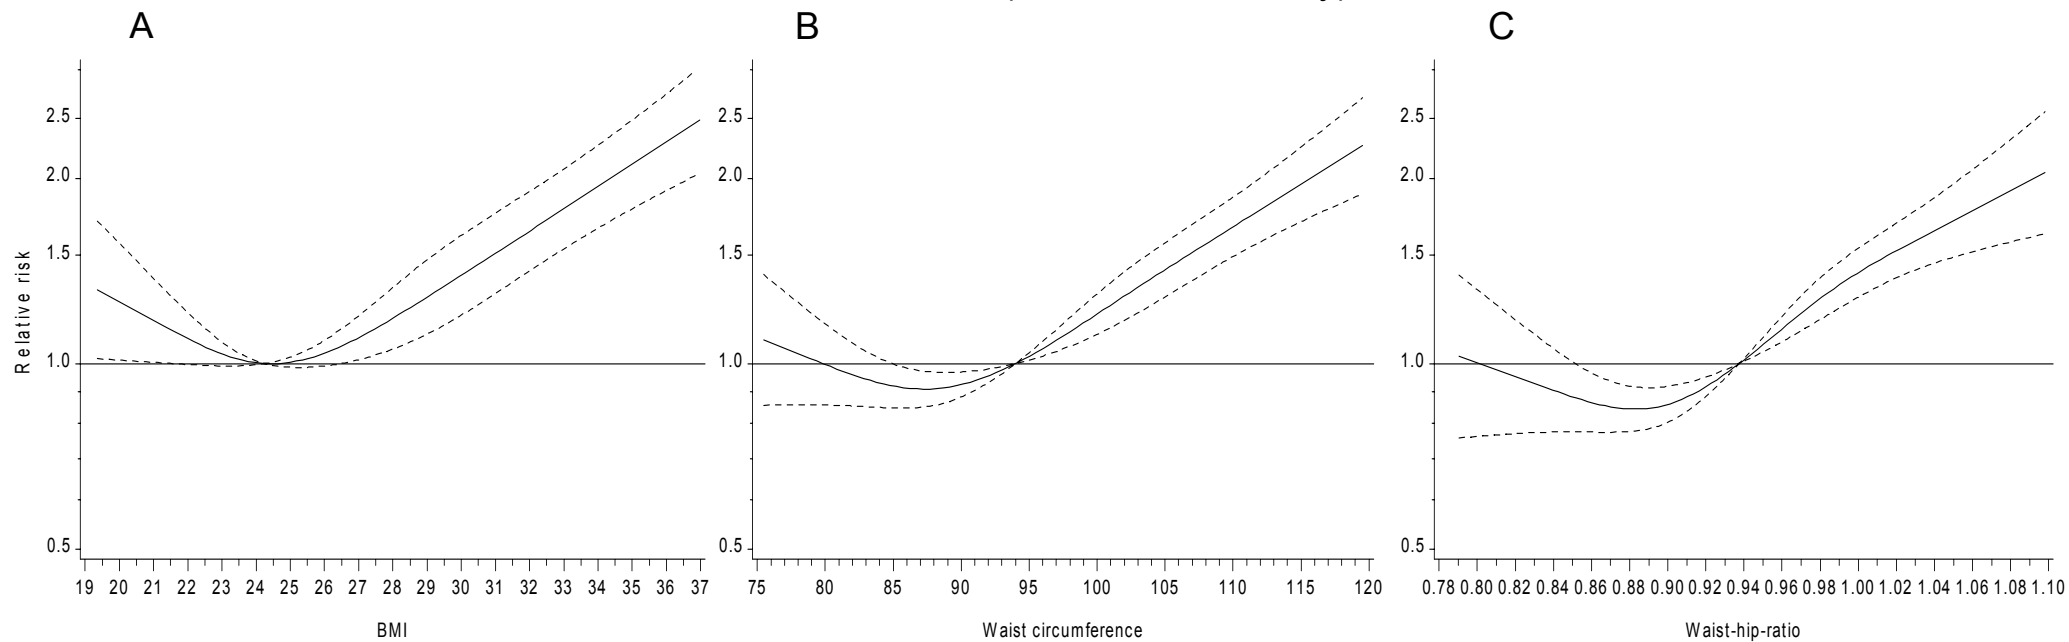

## Women (never smokers only)

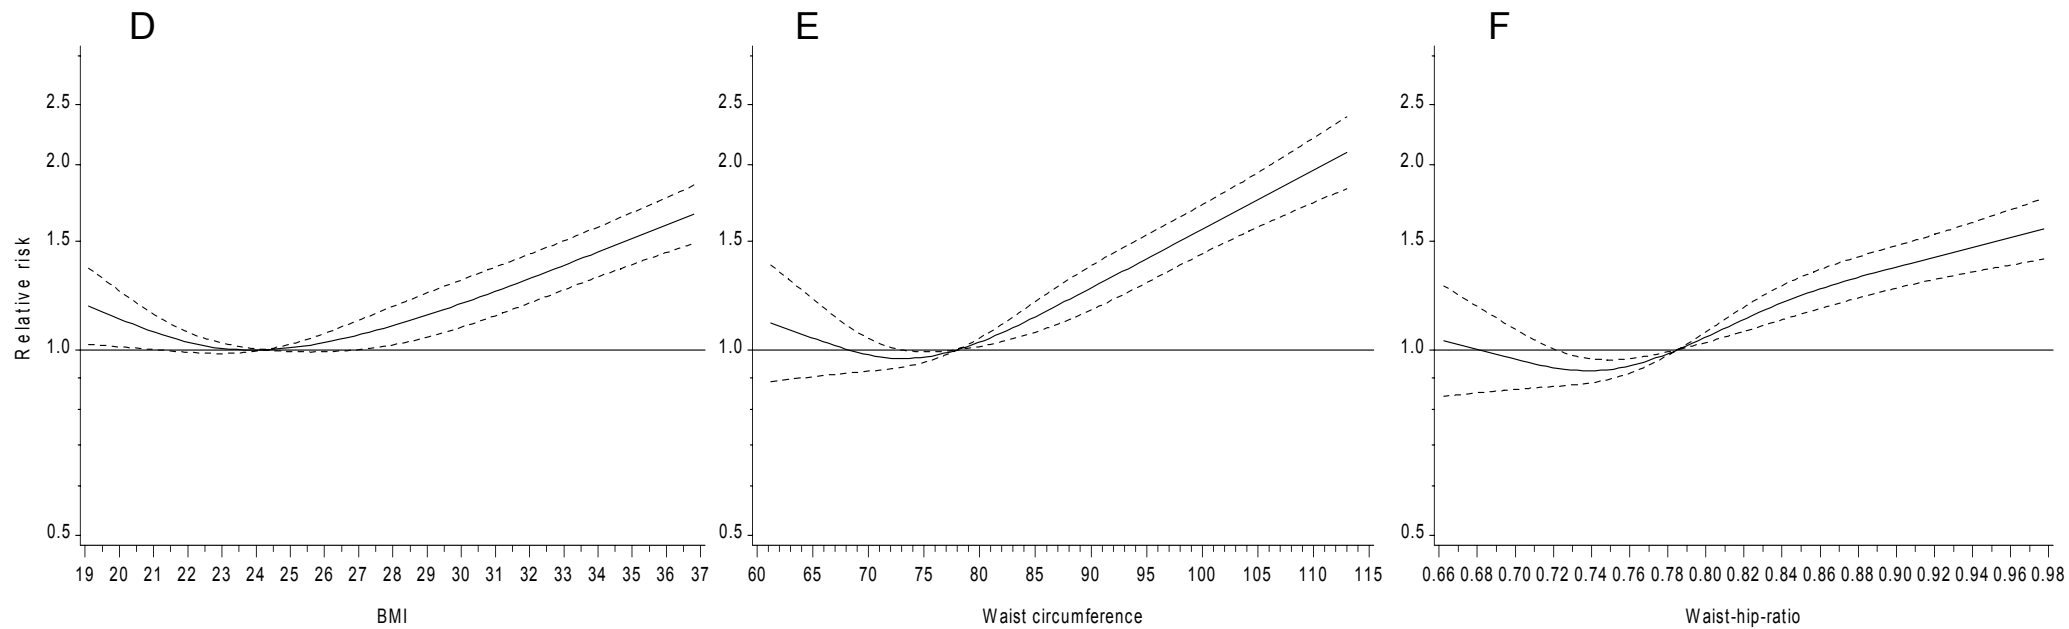

# Supplementary Figure 3

## Men (never smokers only)

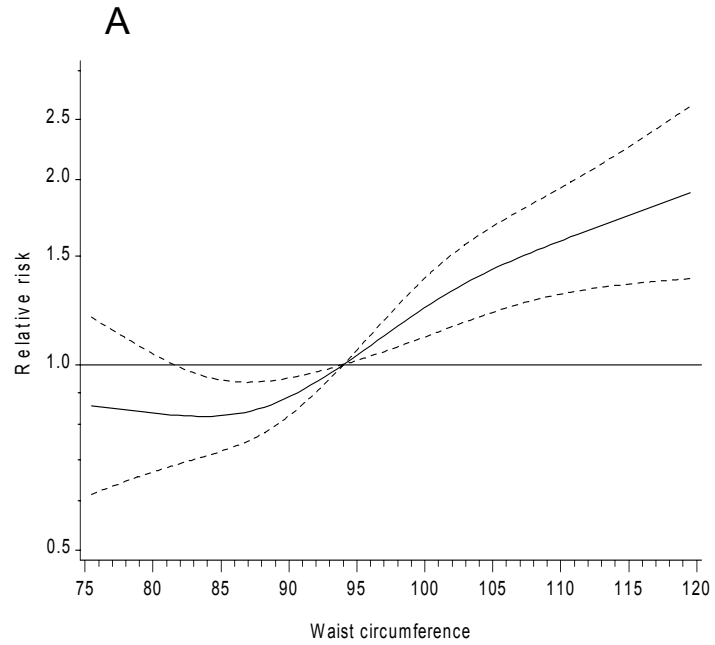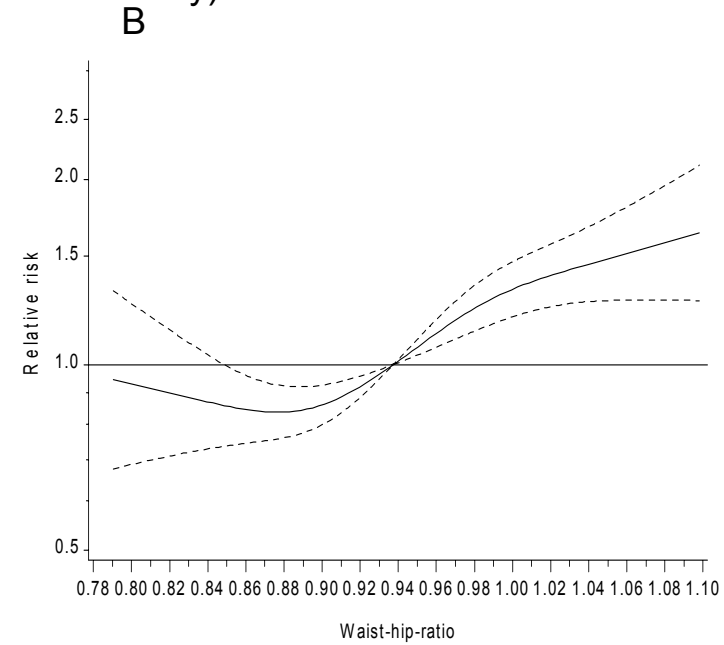

## Women (never smokers only)

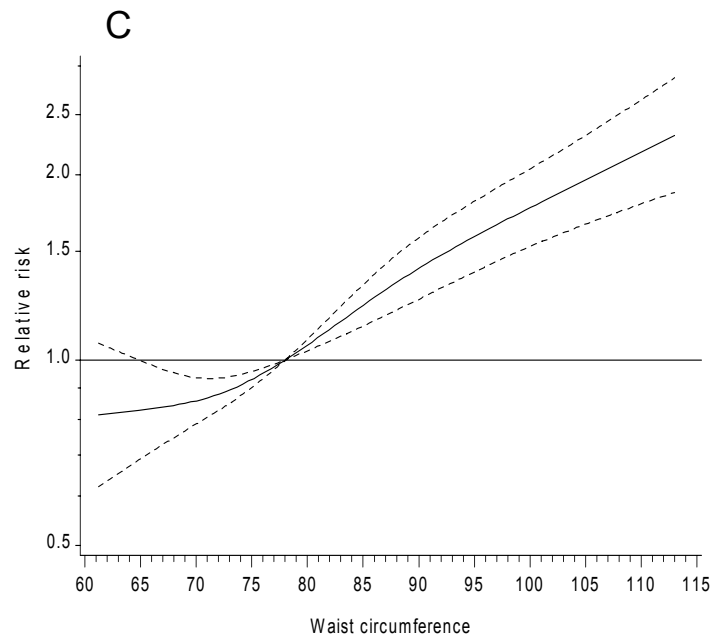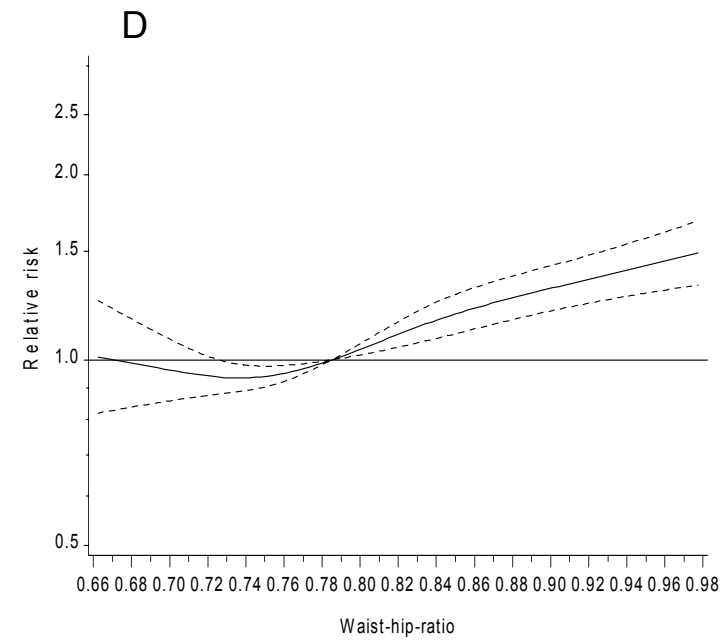

# Supplementary Figure 4

## Men (never smokers only)

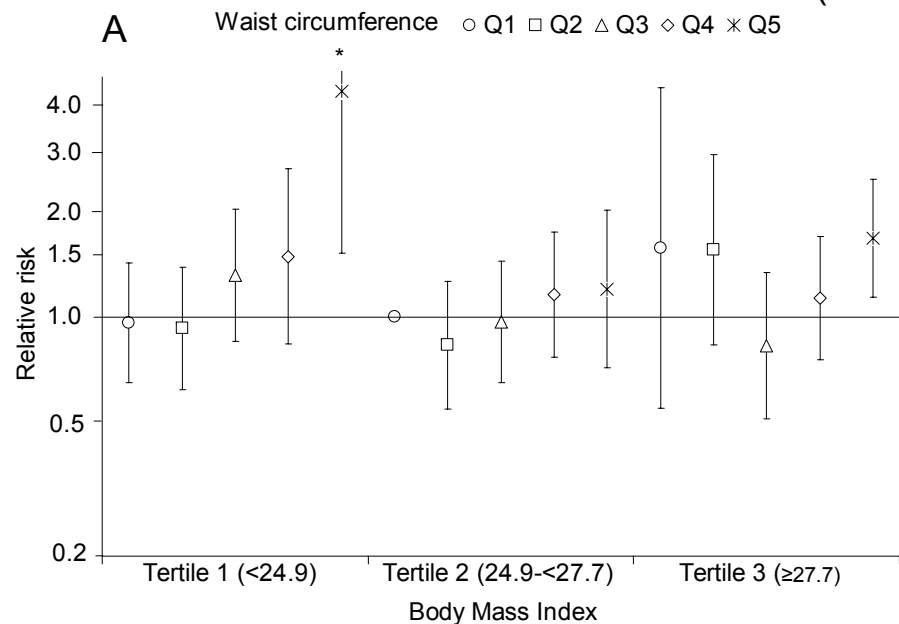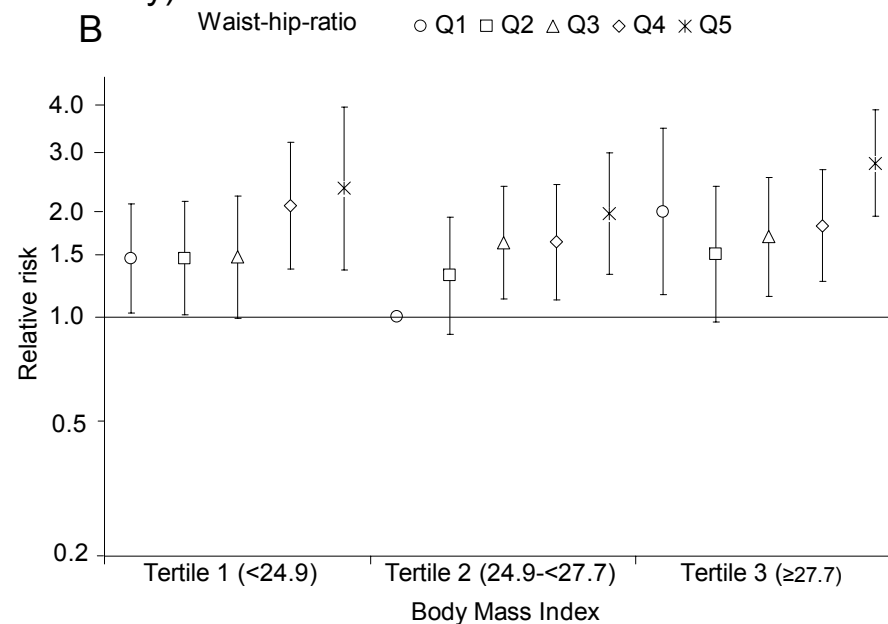

## Women (never smokers only)

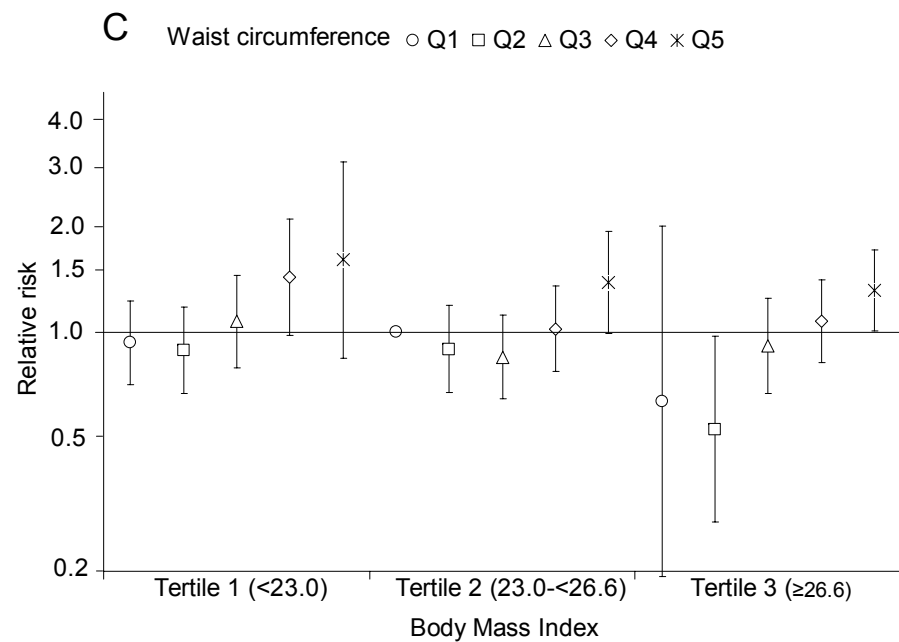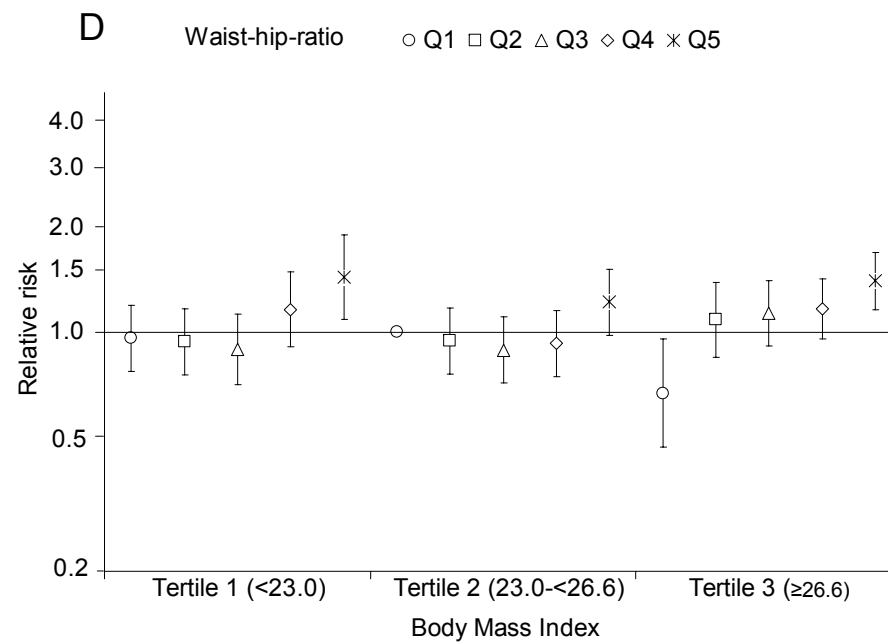

# Supplementary Figure 5

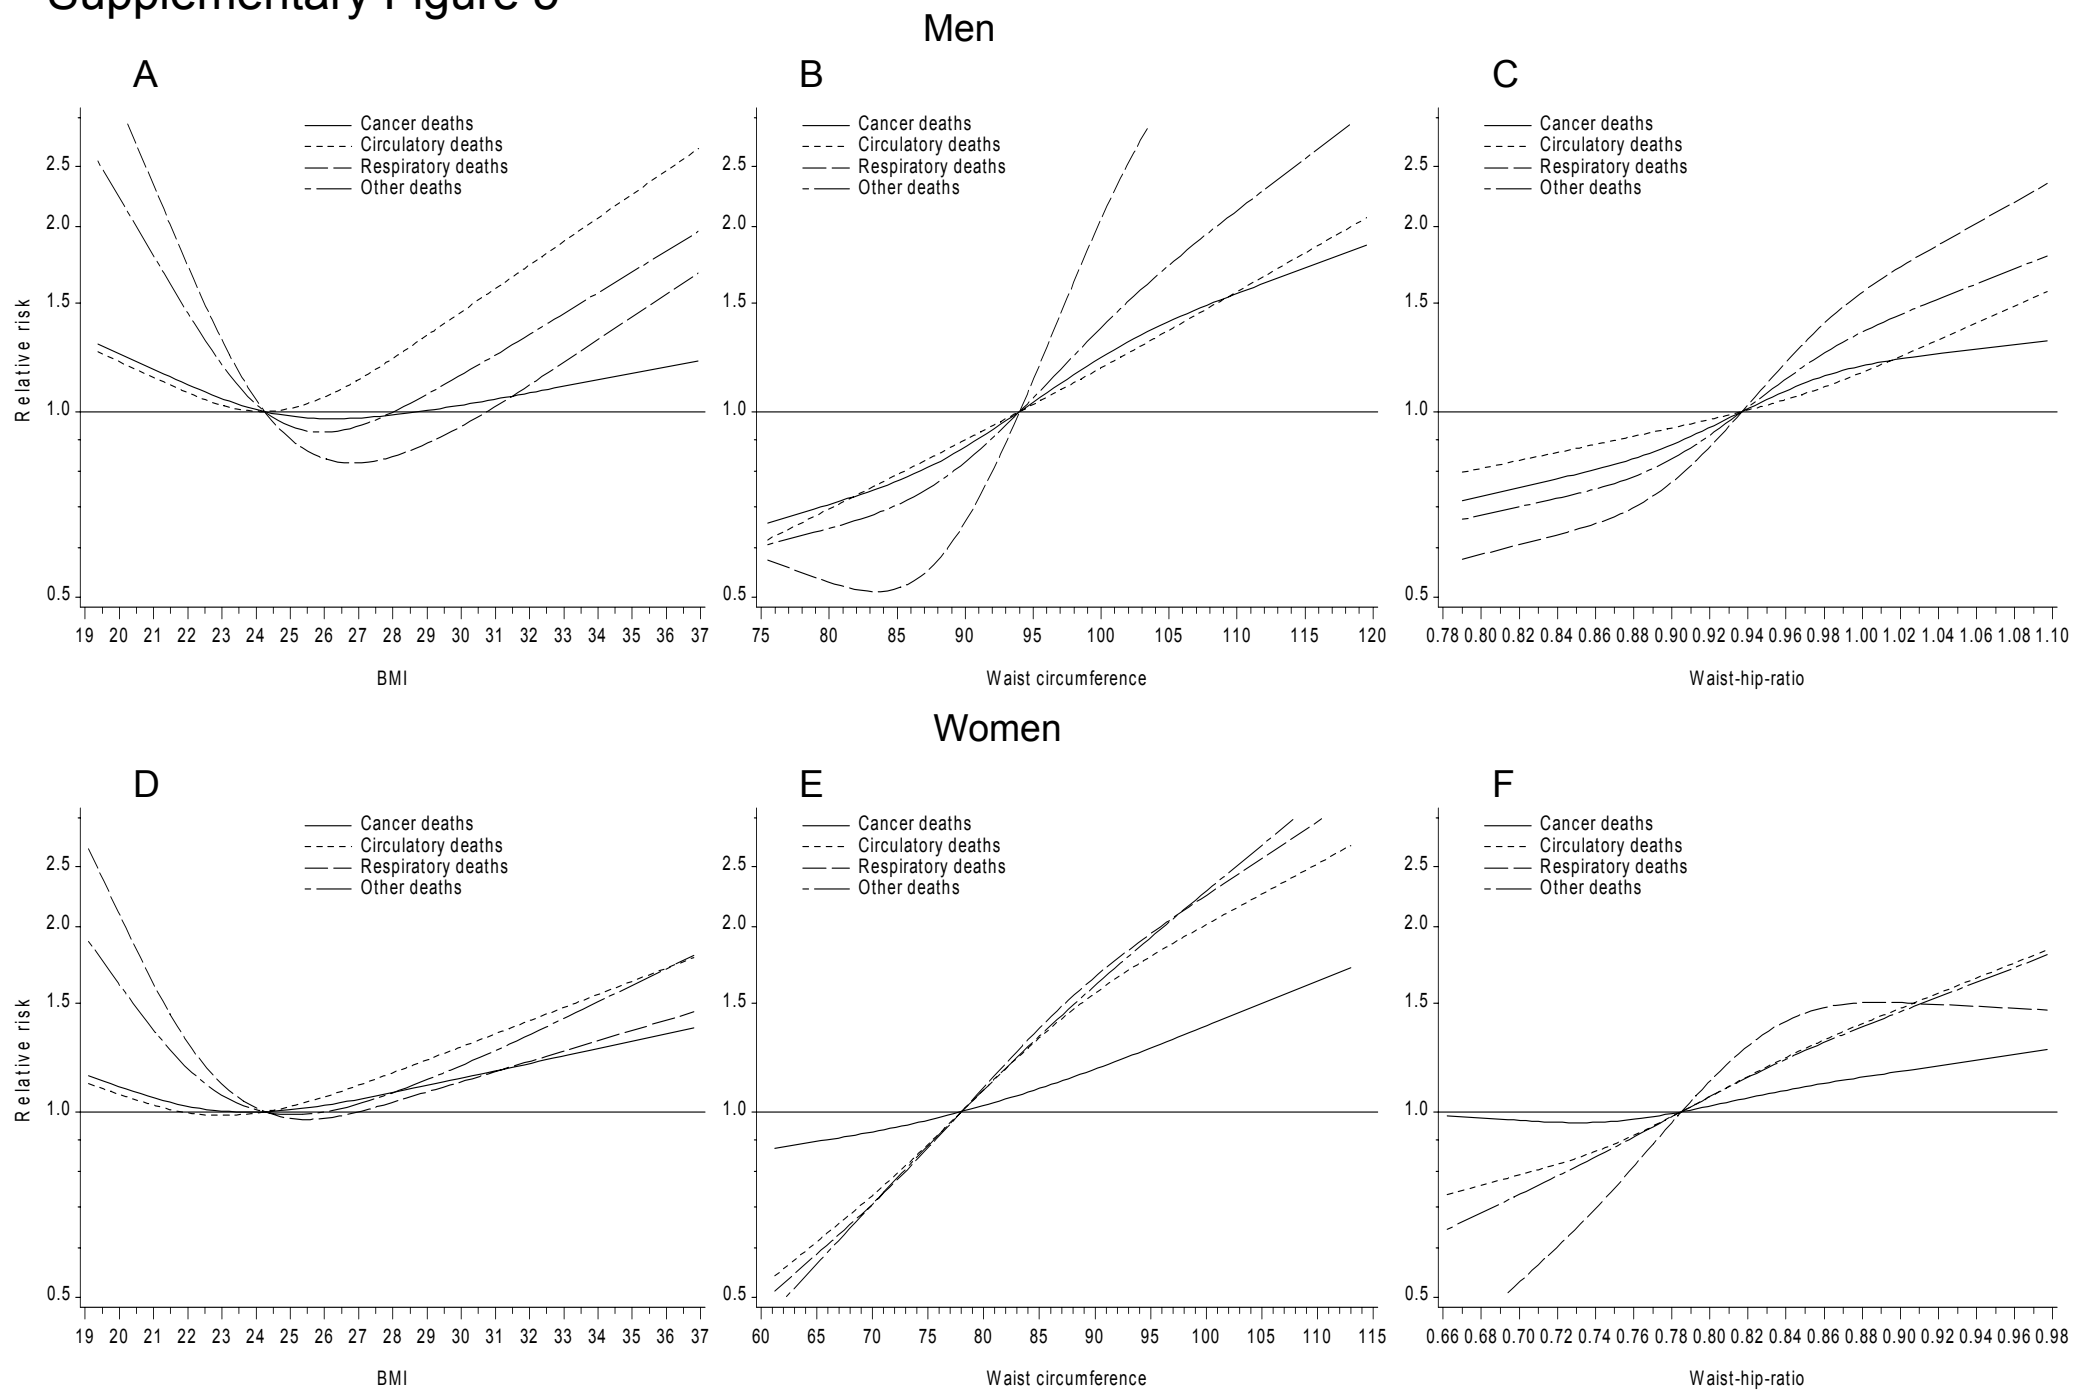

Supplement: nejm_pischon_2105sa1.pdf [file nejm_pischon_2105sa1.pdf]
